# Supplementary material
Source: Springer Nature journal article supplement (https://www.springermedizin.de/resource/supplementary/13063_2013_2028_MOESM6_ESM.pdf/9621208)
Supplement: MOESM6 [file 9621208]

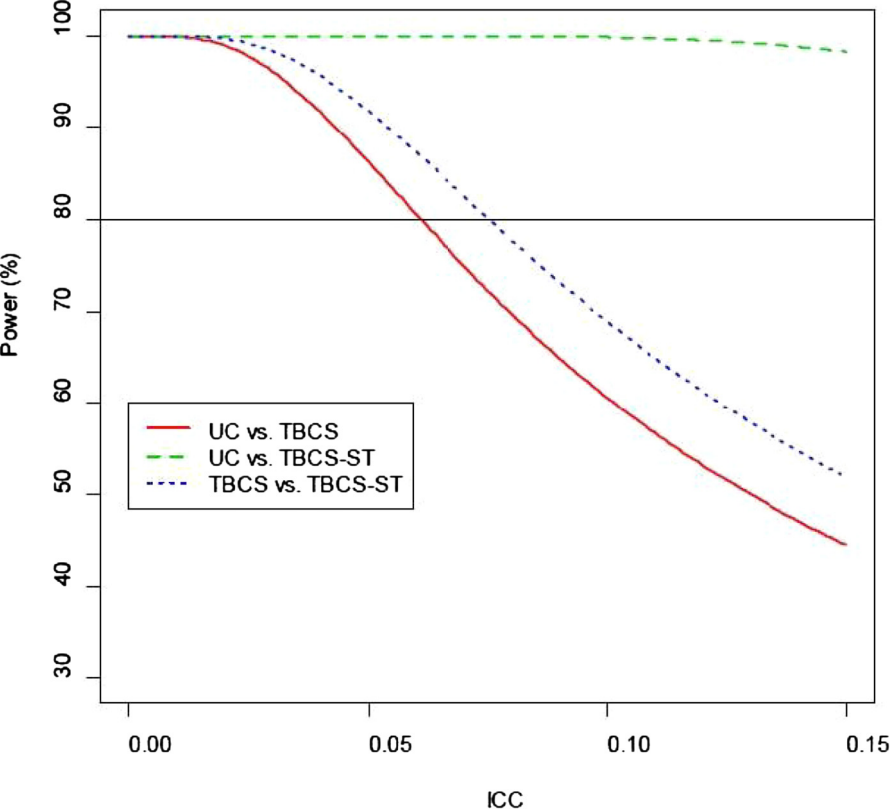

Horizontal line is at 80% power

UC = usual care

TBCS = CHWs with a tailored behavioral communication strategy

TBCS-ST = CHWs with a communication strategy and also equipped with smartphone technology
